# Supplementary material
Source: PubMed Central journal article supplement (PMC4589506)
Supplement: NIHMS714155-supplement-Legacy_Supplemental_File.pdf [file NIHMS714155-supplement-Legacy_Supplemental_File.pdf]

# Change of Authorship Form

(Must be completed and signed by ALL authors)

Please check all that apply

New author(s) have been added (in addition to this form, all new authors must complete the copyright transfer agreement and conflict of interest disclosure.

Change in order of authorship.

An author wishes to remove his/her name. An author's name may only be removed his/her own request and a letter signed by the author should accompany this form

Manuscript Number STROKE/2015/010592

Manuscript Title PD-L1 mAb Treats Ischemic Stroke by Controlling CNS Inflammation

## Former Authorship

Please list ALL AUTHORS in the same order as the original submission. For more than 12, use an extra sheet.

### Print Name

Name (1) Sheetal Bodhankar  
Name (2) Yingxin Chen  
Name (3) Andrew Lapato  
Name (4) Jianming Wang  
Name (5) Arthur Vandembark  
Name (6) Julie Saugstad

### Print Name

Name (7) Halina Offner  
Name (8) \_\_\_\_\_  
Name (9) \_\_\_\_\_  
Name (10) \_\_\_\_\_  
Name (11) \_\_\_\_\_  
Name (12) \_\_\_\_\_

## New Authorship

All authors must sign below agreeing to the changes in authorship. The authorship order must reflect the authorship order of the manuscript.

|                                   |                                      |                      |
|-----------------------------------|--------------------------------------|----------------------|
| Name (1) <u>Sheetal Bodhankar</u> | Signature <u>Sheetal Bodhankar</u>   | Date <u>07/23/15</u> |
| Name (2) <u>Yingxin Chen</u>      | Signature <u>Yingxin Chen</u>        | Date <u>07/23/15</u> |
| Name (3) <u>Andrew Lapato</u>     | Signature _____                      | Date <u>07/23/15</u> |
| Name (4) <u>Abby Dotson</u>       | Signature <u>Abby L Dotson</u>       | Date <u>07/22/15</u> |
| Name (5) <u>Jianming Wang</u>     | Signature <u>Jianming Wang</u>       | Date <u>07/24/15</u> |
| Name (6) <u>Arthur Vandembark</u> | Signature <u>Arthur A Vandembark</u> | Date <u>07/23/15</u> |
| Name (7) <u>Julie Saugstad</u>    | Signature <u>Julie Saugstad</u>      | Date <u>07/22/15</u> |
| Name (8) <u>Halina Offner</u>     | Signature <u>Halina Offner</u>       | Date <u>07/23/15</u> |
| Name (9) _____                    | Signature _____                      | Date _____           |
| Name (10) _____                   | Signature _____                      | Date _____           |
| Name (11) _____                   | Signature _____                      | Date _____           |
| Name (12) _____                   | Signature _____                      | Date _____           |

Please print form and fax to 617-542-6539 or scan and email to [stroke@strokeahajournal.org](mailto:stroke@strokeahajournal.org).
