# Supplementary material
Source: PubMed Central journal article supplement (PMC4589506)
Supplement: NIHMS714155-supplement-Related_Manuscript_File.pdf [file NIHMS714155-supplement-Related_Manuscript_File.pdf]

# Acknowledgment Permission Form

Journal: STROKE

Manuscript No. STROKE/2015/010592

First author: Sheetal Bodhankar

Title of work: PD-L1 mAb Treats Ischemic Stroke by Controlling CNS Inflammation

## Acknowledgment Permission:

Authors must provide written permission/approval from all individuals mentioned by name in the Acknowledgements section of a submitted manuscript. By signing this form, any and all acknowledged persons therefore state that they have read and approved the mention of their names in the Acknowledgment section of the aforementioned paper.

Printed Name: Gail Kent

Signature: 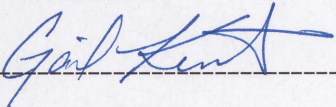-----

Date: 7/15/2015
